# Supplementary material
Source: publisher site journal article supplement (https://www.dovepress.com/article/544443)
Supplement: Supplementary file 1 [file 544443%20Supplementary%20file.docx]

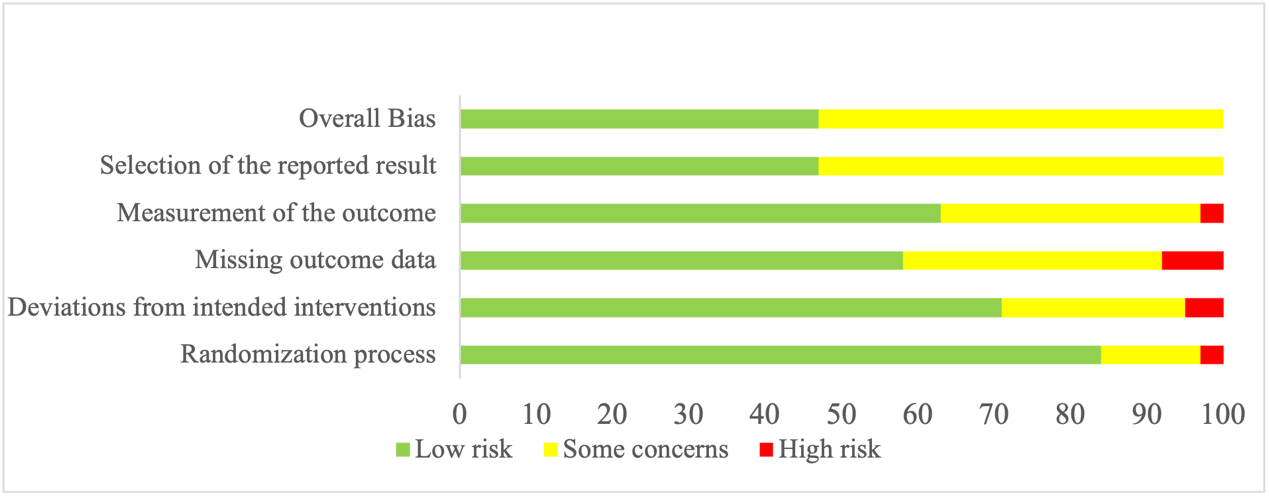


Supplementary Figure 1 Quality assessment of 38 RCTs, low risk of bias (green), some concerns (yellow), high risk (red).

|  | **D1** | **D2** | **D3** | **D4** | **D5** | **Overall** |
| --- | --- | --- | --- | --- | --- | --- |
| Goruntla et al (2019) 33 | 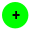 | 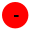 | 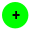 | 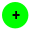 | 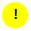 |  |
| Kleinman et al (2017) 34 | 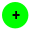 | 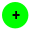 | 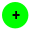 | 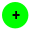 | 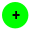 | 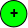 |
| Kandasamy et al (2019) 35 | 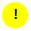 | 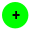 | 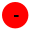 | 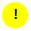 | 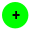 | 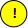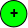 |
| Johncy et al (2020) 36 | 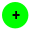 | 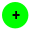 | 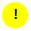 | 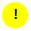 | 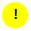 | 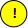 |
| Simon et al (2021) 37 | 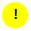 | 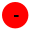 | 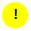 | 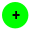 | 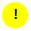 | 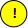 |
| Nelson et al（2016）38 | 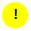 | 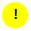 | 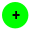 | 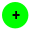 | 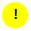 | 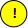 |
| Nelson et al（2021）39 | 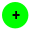 | 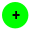 | 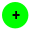 | 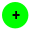 | 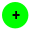 | 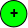 |
| Ramachandran et al (2021) 40 | 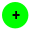 | 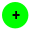 | 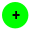 | 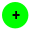 | 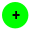 | 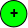 |
| Burner et al (2025) 41 | 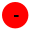 | 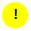 | 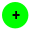 | 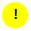 | 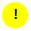 | 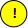 |
| Sarayani et al (2018) 42 | 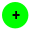 | 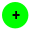 | 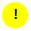 | 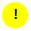 | 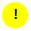 | 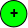 |
| Ranjbaran et al (2022) 11 | 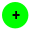 | 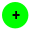 | 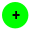 | 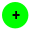 | 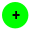 | 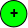 |
| Elyasi et al (2024) 43 | 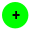 | 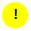 | 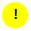 | 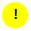 | 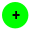 | 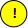 |
| Abbas et al (2023) 44 | 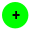 | 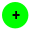 | 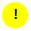 | 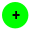 | 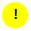 | 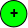 |
| Abubakar & Atif (2021) 45 | 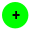 | 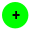 | 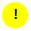 | 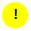 | 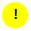 | 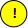 |
| Ting et al (2021) 46 | 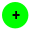 | 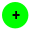 | 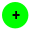 | 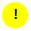 | 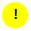 | 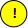 |
| Butt et al (2016) 47 | 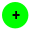 | 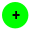 | 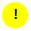 | 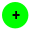 | 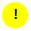 | 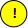 |
| Trevisan et al (2020) 48 | 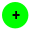 | 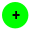 | 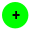 |  |  |  |
| Cani et al (2015) 49 |  |  |  |  |  |  |
| Vluggen et al (2021) 50 |  |  |  |  |  |  |
| Du Pon et al (2019) 51 |  |  |  |  |  |  |
| Wungrath et al (2021) 52 |  |  |  |  |  |  |
| Poonprapaiet al (2022) 53 |  |  |  |  |  |  |
| Xin et al (2015) 54 |  |  |  |  |  |  |
| Zhou et al (2022) 55 |  |  |  |  |  |  |
| Huang et al (2019) 56 |  |  |  |  |  |  |
| Tan et al (2023) 57 |  |  |  |  |  |  |
| Alfian et al (2021) 58 |  |  |  |  |  |  |
| Caetano et al (2018) 59 |  |  |  |  |  |  |
| Abaza & Marschollek (2017) 60 |  |  |  |  |  |  |
| Doupis et al (2019) 56 |  |  |  |  |  |  |
| Gautier et al (2021) 61 |  |  |  |  |  |  |
| Korcegez et al（2017）62 |  |  |  |  |  |  |
| Sugita et al (2017) 63 |  |  |  |  |  |  |
| Erku et al（2017）64 |  |  |  |  |  |  |
| Wishah et al (2015) 65 |  |  |  |  |  |  |
| Caballero et al (2025) 13 |  |  |  |  |  |  |
| Chang et al (2025) 12 |  |  |  |  |  |  |
| El-Deyarb et al (2024) 66 |  |  |  |  |  |  |
|  |  |  |  |  |  |  |

Supplementary Figure 2 Risk of bias summary of 38 RCTs, Low risk of bias (green), some concerns (yellow), high risk (red). D1-Randomization process, D2-Deviations from the intended interventions, D3-Missing outcome data, D4-Measurement of the outcome, D5--Selection of the reported result
